# Supplementary material for: Structural, optical, and bioimaging characterization of carbon quantum dots solvothermally synthesized from o-phenylenediamine
Source: publisher site journal article supplement (doi:10.3762/bjnano.14.17), 2023-01-30
Supplement: Additional file 1 [file 2190-4286-14-17-S1.pdf]

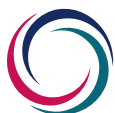

## Supporting Information

for

### **Structural, optical, and bioimaging characterization of carbon quantum dots solvothermally synthesized from *o*-phenylenediamine**

Zoran M. Marković, Milica D. Budimir, Martin Danko, Dušan D. Milivojević, Pavel Kubat, Danica Z. Zmejkoski, Vladimir B. Pavlović, Marija M. Mojsin, Milena J. Stevanović and Biljana M. Todorović Marković

*Beilstein J. Nanotechnol.* **2023**, *14*, 165–174. [doi:10.3762/bjnano.14.17](https://doi.org/10.3762/bjnano.14.17)

## Additional experimental data

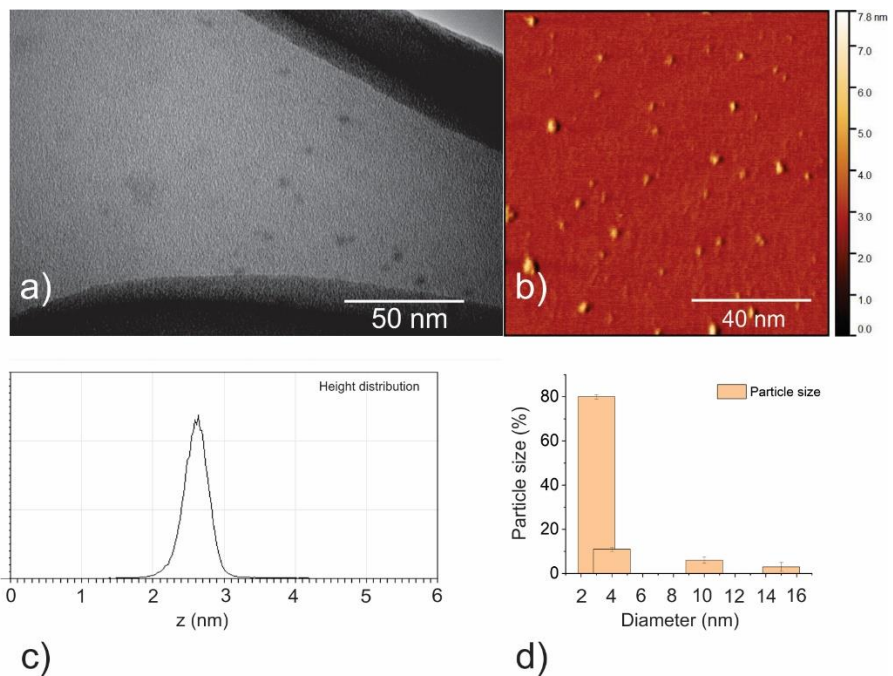

**Figure S1:** (a) TEM micrograph of CQDs, (b) top view AFM image of CQDs, (c) height profile of CQDs, and (d) particle size distribution of CQDs.

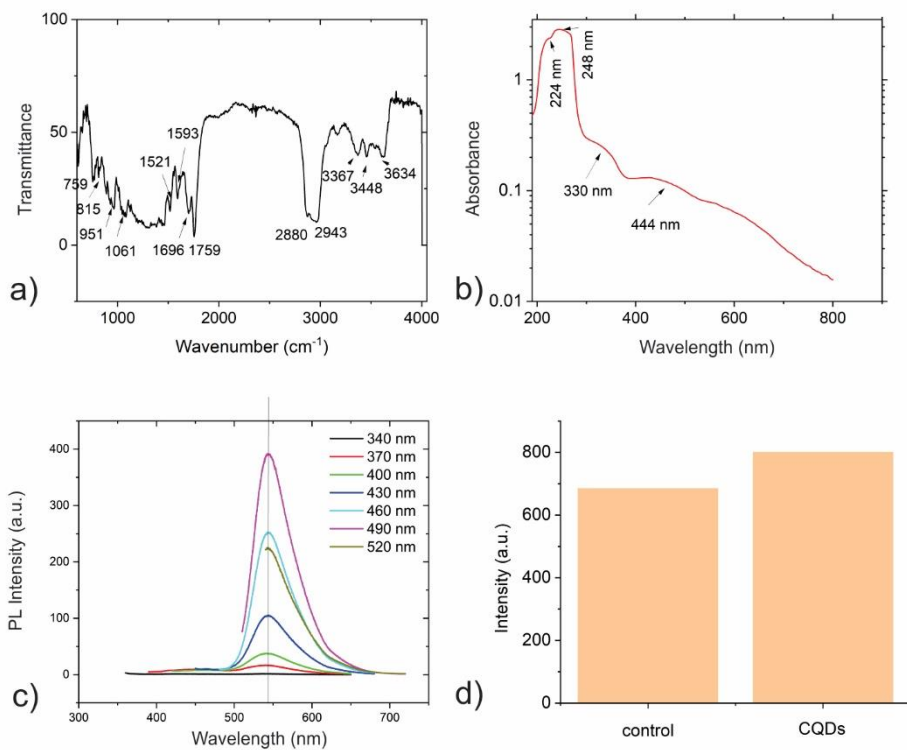

**Figure S2:** (a) FTIR spectrum of CQDs, (b) UV-vis spectrum of CQDs, (c) PL spectra of CQDs, and (d) EPR spectra of CQDs samples.

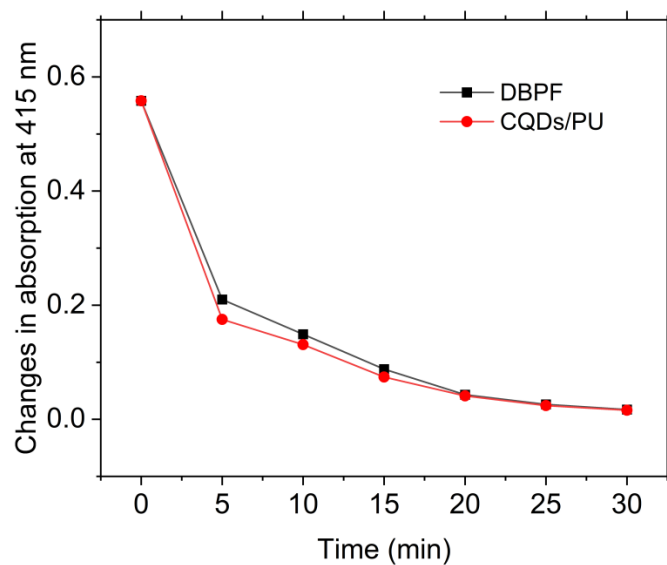

**Figure S3:** Changes in absorption at 415 nm of DBPF (black curve) and CQDs/PU composite sample (red curve).

**Table S1:** Antibacterial activity of CQDs/PU composite samples.

| Bacteria strains | Irradiation time (min) | Antibacterial activity |
|------------------|------------------------|------------------------|
| <i>E. coli</i>   | 15                     | no                     |
|                  | 30                     | no                     |
|                  | 60                     | no                     |
|                  | 360                    | no                     |
| <i>S. aureus</i> | 60                     | no                     |
|                  | 120                    | no                     |
|                  | 240                    | no                     |
|                  | 360                    | no                     |
